# Supplementary material
Source: MDPI journal article supplement (https://www.mdpi.com/2071-1050/8/11/1147)
Supplement: s1 [file s1]

# Supplementary Materials: Carbon Footprint of Inbound Tourism to Iceland: A Consumption-Based Life Cycle Assessment including Direct and Indirect Emissions

Hannah Sharp, Josefine Grundius and Jukka Heinonen

**Table S1.** Structure of tourism sector in Icelandic National Accounts: the Icelandic categories under each UNWTO category within the tourism industry, and the Icelandic industry classification of activities (ISAT) codes.

| No. | UNWTO Categories of Tourism Industries         | ISAT Codes | Icelandic Categories                                                        |
|-----|------------------------------------------------|------------|-----------------------------------------------------------------------------|
| 1   | Accommodation for visitors                     | 55.10.1    | Hotels and similar accommodation, without restaurants                       |
|     |                                                | 55.10.2    | Hotels and similar accommodation, with restaurants                          |
|     |                                                | 55.20.0    | Holiday and other short-stay accommodation                                  |
|     |                                                | 55.30.0    | Camping grounds, recreational vehicle parks and trailer parks               |
|     |                                                | 55.90.0    | Other accommodation                                                         |
|     |                                                | 68.20.1    | Letting of residential housing *                                            |
|     |                                                | 68.31.0    | Real estate agencies *                                                      |
|     |                                                | 68.32.0    | Management of real estate on a fee or contract basis *                      |
| 2   | Food & Beverage serving industry               | 56.10.0    | Restaurants and mobile food service activities                              |
|     |                                                | 56.29.0    | Other food service activities                                               |
|     |                                                | 56.30.0    | Beverage serving activities                                                 |
| 3   | Railways passenger transportation              |            | Not applicable in Iceland                                                   |
| 4   | Road passenger transportation                  | 49.32.0    | Taxi operation                                                              |
|     |                                                | 49.39.0    | Other passenger land transport                                              |
| 5   | Water passenger transportation                 | 50.10.0    | Sea and coastal passenger water transport                                   |
|     |                                                | 50.30.0    | Inland passenger water transport                                            |
| 6   | Air passenger transportation                   | 51.10.1    | Scheduled air transport                                                     |
|     |                                                | 51.10.2    | Non-scheduled air transport                                                 |
| 7   | Transport equipment rental                     | 77.11.0    | Renting and leasing of cars and light motor vehicles                        |
|     |                                                | 77.12.0    | Renting and leasing of trucks                                               |
| 8   | Travel agencies and other reservation services | 79.11.0    | Travel agency activities                                                    |
|     |                                                | 79.12.0    | Tour operator activities                                                    |
|     |                                                | 79.90.0    | Other reservation service and related activities                            |
| 9   | Cultural services                              | 90.01.0    | Performing arts                                                             |
|     |                                                | 90.02.0    | Support activities to performing arts                                       |
|     |                                                | 90.03.0    | Artistic creation                                                           |
|     |                                                | 90.04.0    | Operation of arts facilities                                                |
|     |                                                | 91.02.0    | Museums activities                                                          |
|     |                                                | 91.03.0    | Operation of historical sites and buildings and similar visitor attractions |
|     |                                                | 91.04.0    | Botanical and zoological gardens and nature reserves activities             |

Table S1. Cont.

| No. | UNWTO Categories of Tourism Industries            | ISAT Codes | Icelandic Categories                                 |
|-----|---------------------------------------------------|------------|------------------------------------------------------|
| 10  | Sport and recreational services                   | 77.21.0    | Renting and leasing of recreational and sports       |
|     |                                                   | 92.00.0    | Gambling and betting activities                      |
|     |                                                   | 93.11.0    | Operation of sports facilities                       |
|     |                                                   | 93.13.0    | Fitness facilities                                   |
|     |                                                   | 93.19.0    | Other sports activities                              |
|     |                                                   | 93.21.0    | Activities of amusement parks and theme parks        |
|     |                                                   | 93.29.0    | Other amusement and recreation activities            |
| 11  | Country-specific tourism characteristics goods    | 47.30.0    | Retail sale of automotive fuel in specialized stores |
|     |                                                   | **         | Retail trade of handicraft                           |
|     |                                                   | **         | Retail trade of souvenirs                            |
| 12  | Country-specific tourism characteristics services | 93.12.0    | Activities of sports clubs (e.g. golf)               |

\* Only a part what is related to second homes and timeshare properties; \*\* no ISAT codes allocated.

**Table S2.** The EIOLCA categories and other data sources used in matching with the Icelandic expenditure data categories for the GHG assessment.

| Statistics Iceland Category                          | Sub-Category (from CRS)                       | Input Output Model Category/Other Source                         |
|------------------------------------------------------|-----------------------------------------------|------------------------------------------------------------------|
| Accommodation services                               | Hotel Accommodation                           | 7211A0 Hotels and motels, including casino hotels                |
|                                                      | Other accommodation service                   | 721A00 Other accommodations                                      |
| Food and Beverage Serving Services                   | Catering                                      | 722000 Food services and drinking places                         |
|                                                      | Other                                         | 722000 Food services and drinking places                         |
| Transport                                            | Passenger transport by land                   | 485000 Transit and ground passenger                              |
|                                                      | Passenger transport by sea                    | 483000 Water transportation                                      |
|                                                      | Passenger transport by air                    | Chester and Horvath (2009)                                       |
|                                                      | Car rental                                    | 532100 Automotive equipment rental and leasing                   |
|                                                      | Tolls, parking fees and other services        | 8111A0 Automotive repair and maintenance                         |
|                                                      | Petrol, repair and maintenance                | 324110 Petroleum refineries + fuel combustion                    |
| Travel Agency Services (inc Tour Operators)          |                                               | 8A0 Scenic and sightseeing transportation and support activities |
| Sports and Recreation                                |                                               | 7130 Amusements, gambling, and recreation                        |
| Cultural Services and Sports and Recreation Services | Museums, galleries and zoos                   | 712000 Museums, historical sites, zoos, and parks                |
|                                                      | Concerts, theatre, film screenings and events | 711500 Independent artists, writers, and performers              |
|                                                      | Other                                         | 713B00 Other amusement and recreation industries                 |
|                                                      |                                               |                                                                  |
| General Goods Retail                                 | Groceries                                     | 3110 Food manufacturing                                          |
|                                                      | Retail sale of clothing                       | 3150 Apparel manufacturing                                       |
|                                                      | Gifts and souvenir shop                       | 4A0000 Retail trade                                              |
|                                                      | Duty free shops                               | 4A0000 Retail trade                                              |
|                                                      | Other shops                                   | 4A0000 Retail trade                                              |
| General Other Services                               | Various tourism services                      | S00700 General State and Local Government                        |
|                                                      | Various other services                        | 813B00 Civic, social, professional and similar                   |
|                                                      | Government charges                            | S00700 General State and Local Government                        |
|                                                      | Withdrawals of cash                           | 813B00 Civic, social, professional and similar                   |

**Table S3.** Comparison of results with other studies.

| Category                 | Current Study | [1]     | [2]       | [3] | [4] | [5] | [6] | [7]   |
|--------------------------|---------------|---------|-----------|-----|-----|-----|-----|-------|
| Share of Total Emissions |               |         |           |     |     |     |     |       |
| International Air Travel | 50%–83%       | 40%–50% | 63%–89%   | 71% | NA  | 56% | 90% | 80.8% |
| Other Transport          | 10%–30%       | 16%–35% | 10%–35%   | 23% | 63% |     |     | 2.1%  |
| Accommodation            | 2%–6%         | 21%–24% | 0.2%–0.4% | 16% | 9%  | 27% | 6%  | 13.4% |
| Activities               | 2%–5%         | 4%–6%   | 0.5%–2%   | NA  | NA  | 17% | 4%  | 2.7%  |
| Retail                   | 2%–6%         | NA      | NA        | 8%  | 10% |     | NA  | NA    |
| Other                    | 1%–3%         | NA      | NA        | NA  | 18% |     | NA  | NA    |

## References

1. UNWTO-UNEP-WMO. *Climate Change and Tourism—Responding to Global Challenges*; World Tourism Organization: Madrid, Spain, 2008.
2. Björnsson, V.J. *Estimated Carbon Footprint of Foreign Tourists in Iceland—A Bottom-Up Analysis of Direct CO<sub>2</sub> Emissions*; University of Iceland: Reykjavik, Iceland, 2014.
3. Patterson, M.G.; McDonald, G. *How Clean and Green is New Zealand Tourism? Lifecycle and Future Environmental Impacts*; Manaaki Whenua Press: Lincoln, New Zealand, 2004.
4. Dwyer, L.; Forsyth, P.; Spurr, R.; Hoque, S. Estimate the carbon footprint of Australian tourism. *J. Sustain. Tour.* **2010**, *8*, 355–376.
5. De Bruijn, K.; Dirven, R.; Eijgelaar, E.; Peeters, P. Travelling large in 2012—The Carbon Footprint of Dutch Holidaymakers in 2012 and the Development Since 2002. 2012. Available online: [http://www.cstt.nl/userdata/documents/cstt2013\\_travellinglargein2012\\_lowres.pdf](http://www.cstt.nl/userdata/documents/cstt2013_travellinglargein2012_lowres.pdf) (accessed on 17 November 2015).
6. Gössling, S. National emissions from tourism: an overlooked policy challenge? *Energy Policy* **2013**, *59*, 433–442.
7. Filimonau, V.; Dickinson, J.; Robbins, D.; Reddy, M.V. The role of ‘indirect’ greenhouse gas emissions in tourism: Assessing the hidden carbon impacts from a holiday package tour. *Transp. Res. Part A* **2013**, *54*, 78–91.
